# Supplementary material
Source: HighWire-hosted journal article supplement (https://www.annfammed.org/highwire/filestream/619/field_highwire_adjunct_files/0/Guksayana_Supp_App.pdf)
Supplement: Guksayana_Supp_App.pdf [file Guksayana_Supp_App.pdf]

## Supplemental materials for:

Gukasyan S, Wong M. An empanelment toolkit for the safety-net clinic setting. *Ann Fam Med*. 2019;17(Suppl 1):S84.

Submitted August 31, 2018; accepted November 1, 2018.

**Funding support:** This research was supported by the CMS-funded Transforming Clinical Practice Initiative (grant number CMS-1L1-15-003) project through the Los Angeles Practice Transformation Network, an LA Care Health Plan project.

**Disclaimer:** Stella Gukasyan, EdM: no conflicts of interest declared. The funding organizations had no role in the study design, data collection, analysis or interpretation of data, or writing or submitting the manuscript.

**Previous presentations:** Portions of this study have been presented at the California Primary Care Association Quality Care Conference; March 1, 2018; Sacramento, California.

**Acknowledgments:** The authors thank the Transforming Clinical Practice Initiative, a project of the Center for Medicare & Medicaid Innovation (grant number CMS-1L1-15-003); the Los Angeles Practice Transformation Network, a Project of LA Care Health Plan; and Community Clinic Association of Los Angeles County for their project management support and guidance. In addition, the authors thank the Elevation Health Partners Team for their tireless contribution to the outlined body of work and their assistance with editing the manuscript.

---

## References

1. Bodenheimer T, Ghorob A, Willard-Grace R, Grumbach K. The 10 building blocks of high-performing primary care. *Ann Fam Med*. 2014;12(2):166-171.
  2. Brownlee B, Van Borkulo N. Empanelment: establishing patient-provider relationships. In: Phillips KE, Weir V, eds. *Safety Net Medical Home Initiative Implementation Guide Series*. 2nd ed. Seattle, WA: Qualis Health and The MacColl Center for Health Care Innovation at the Group Health Research Institute; 2013.
-
